# Supplementary material for: A prediction model for progressive disease in systemic sclerosis
Source: HighWire-hosted journal article supplement (doi:10.1136/rmdopen-2015-000113), 2015-12-01

## Supplementary file

### Univariable logistic regression analysis for patients with DcSSc and LcSSc separately

**Table 1. Univariable logistic regression analysis of 64 DcSSc patients with progressive and stable disease**

|                                       | <b>Adjusted*<br/>Univariable Odds<br/>Ratio (95% CI)</b> | <b>p-value</b> |
|---------------------------------------|----------------------------------------------------------|----------------|
| <b>Sociodemographics</b>              |                                                          |                |
| Age, years, mean (SD)                 | 1.014 (0.977-1.051)                                      | 0.471          |
| Female, N (%)                         | 0.871 (0.283-2.684)                                      | 0.810          |
| Body weight, kg, mean (SD)            | 0.997 (0.959-1.036)                                      | 0.869          |
| <b>Disease characteristics, N (%)</b> |                                                          |                |
| Friction rubs                         | 7.816 (0.792-77.165)                                     | 0.078          |
| Proximal muscular weakness            | 5.176 (0.931-28.771)                                     | 0.060          |
| Pulmonary crackles                    | 2.101 (0.734-6.018)                                      | 0.167          |
| MRSS, median (IQR)                    | 1.043 (0.996-1.092)                                      | 0.075          |
| <b>Laboratory investigations</b>      |                                                          |                |
| EGFR, ml/min, median (IQR)            | 1.008 (0.993-1.023)                                      | 0.281          |
| <b>Cardiopulmonary investigations</b> |                                                          |                |
| FVC % of predicted, mean (SD)         | 0.994 (0.986-1.020)                                      | 0.635          |
| DLCO % of predicted, mean (SD)        | 0.976 (0.946-1.007)                                      | 0.123          |
| Maximum VO2 % of predicted, mean (SD) |                                                          |                |
| <b>SF-36, median (IQR)</b>            | 0.988 (0.974-1.002)                                      | 0.091          |
| Physical Component Summary Scale      | 0.959 (0.914-1.006)                                      | 0.088          |
| <b>SHAQ (0-3), median (IQR)†</b>      | 2.257 (0.967-5.039)                                      | 0.059          |

FVC: forced vital capacity; DLCO: diffusing capacity for carbon monoxide; VO2: volume oxygen uptake; SF-36: Short Form-36; IQR: interquartile range.

\* Adjusted for previous or current treatment on baseline evaluation with cyclophosphamide, methotrexate or autologous hemapoietic stem cell transplantation.

**Table 2. Univariable logistic regression analysis of 79 LcSSc patients with progressive and stable disease**

|                                       | <b>Adjusted*<br/>Univariable Odds<br/>Ratio (95% CI)</b> | <b>p-value</b> |
|---------------------------------------|----------------------------------------------------------|----------------|
| <b>Sociodemographics</b>              |                                                          |                |
| Age, years, mean (SD)                 | 1.012 (0.977-1.047)                                      | 0.506          |
| Female, N (%)                         | 2.763 (0.837-9.124)                                      | 0.095          |
| Body weight, kg, mean (SD)            | 0.993 (0.953-1.791)                                      | 0.732          |
| <b>Disease characteristics, N (%)</b> |                                                          |                |
| Friction rubs                         | NA                                                       |                |
| Proximal muscular weakness            | NA                                                       |                |
| Pulmonary crackles                    | 1.957 (0.554-6.909)                                      | 0.297          |
| MRSS, median (IQR)                    | 0.985 (0.798-1.218)                                      | 0.887          |
| <b>Laboratory investigations</b>      |                                                          |                |
| EGFR, ml/min, median (IQR)            | 1.003 (0.997-1.009)                                      | 0.311          |
| <b>Cardiopulmonary investigations</b> |                                                          |                |
| FVC % of predicted, mean (SD)         | 0.980 (0.957-1.003)                                      | 0.093          |
| DLCO % of predicted, mean (SD)        | 0.970 (0.940-1.001)                                      | 0.054          |
| Maximum VO2 % of predicted, mean (SD) | 0.980 (0.964-0.997)                                      | 0.017          |
| <b>SF-36, median (IQR)</b>            |                                                          |                |
| Physical Component Summary Scale      | 0.947 (0.901-0.996)                                      | 0.034          |
| <b>SHAQ (0-3), median (IQR)†</b>      | <b>1.861 (0.766-4.414)</b>                               | <b>0.168</b>   |

FVC: forced vital capacity; DLCO: diffusing capacity for carbon monoxide; VO2: volume oxygen uptake; SF-36: Short Form-36; IQR: interquartile range.

\* Adjusted for previous or current treatment on baseline evaluation with cyclophosphamide, methotrexate or autologous hemapoietic stem cell transplantation.

**Table 3. Independent predictive variables for progressive disease in LcSSc based on multivariable logistic regression analysis**

| <b>Predictors</b>                         | <b>B</b> | <b>OR</b> | <b>95% CI</b> | <b>P-value</b> |
|-------------------------------------------|----------|-----------|---------------|----------------|
| Age, years                                | 0.020    | 1.020     | 0.983-1.058   | 0.296          |
| Female                                    | 0.932    | 2.539     | 0.725-8.893   | 0.145          |
| Maximum VO <sub>2</sub> , % of predicted* | -0.014   | 0.986     | 0.966-1.006   | 0.173          |
| Missing indicator variable CPET           | 0.437    | 1.548     | 0.073-32.738  | 0.779          |

VO<sub>2</sub>: volume oxygen uptake; CPET: cardiopulmonary exercise test.

\* Beta is 0 if CPET is missing

**Figure 1. Percentage of patients fulfilling criteria contributing to overall progressive disease**

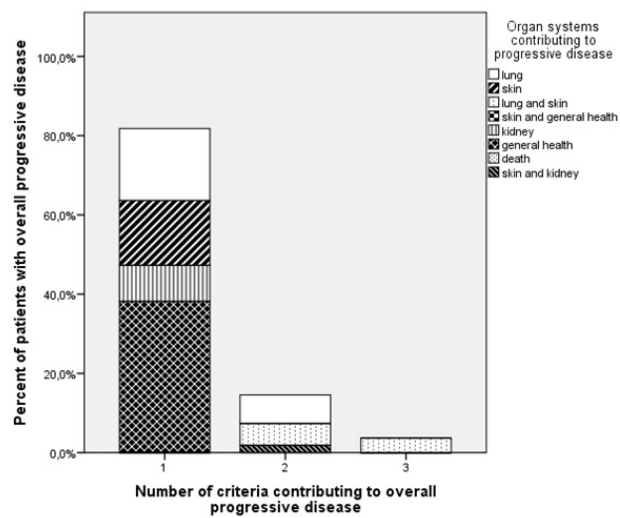

**Figure 2. Calibration plot of patients with observed progressive disease versus predicted probability of progressive disease**

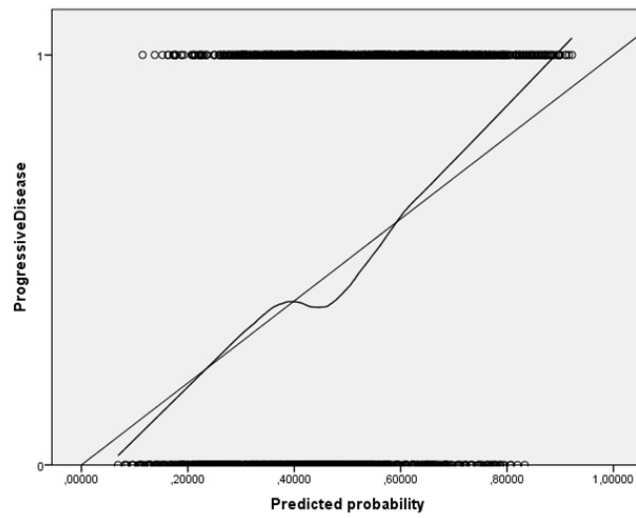

**Figure 3. Receiver operation characteristic curve for the prediction model**

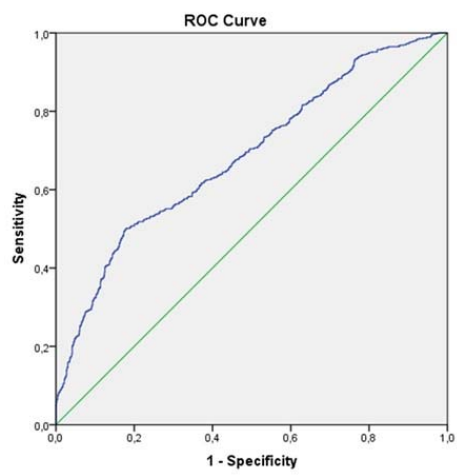

Supplement: rmdopen-2015-000113supp.pdf [file rmdopen-2015-000113supp.pdf]
